# Supplementary material for: Band alignment and Schottky behaviour of InN/GaN heterostructure grown by low-temperature low-energy nitrogen ion bombardment
Source: Royal Society of Chemistry journal article supplement (doi:10.1039/c4ra02533d), 2014-01-01
Supplement: c4ra02533d1.pdf [file c4ra02533d1.pdf]

### Supplementary Documents

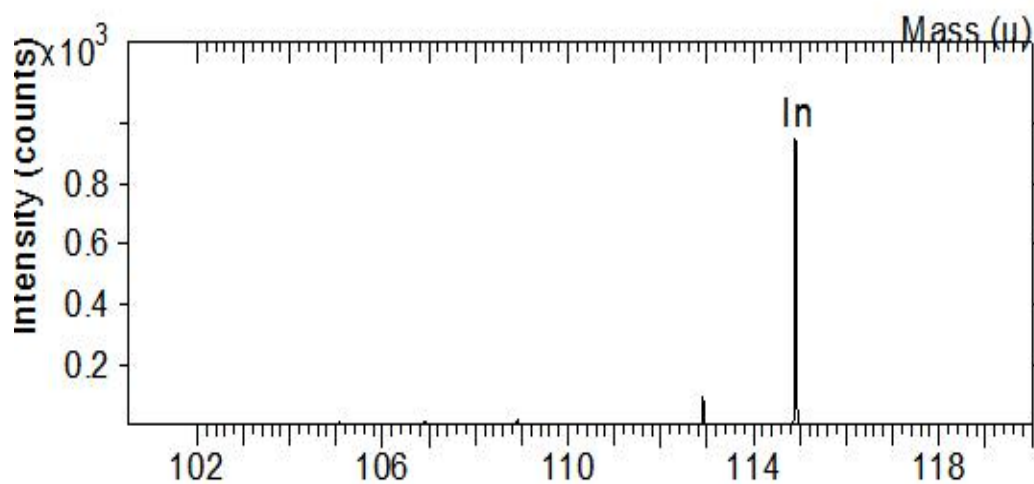

Figure S1. Mass spectra of In during SIMS sputtering

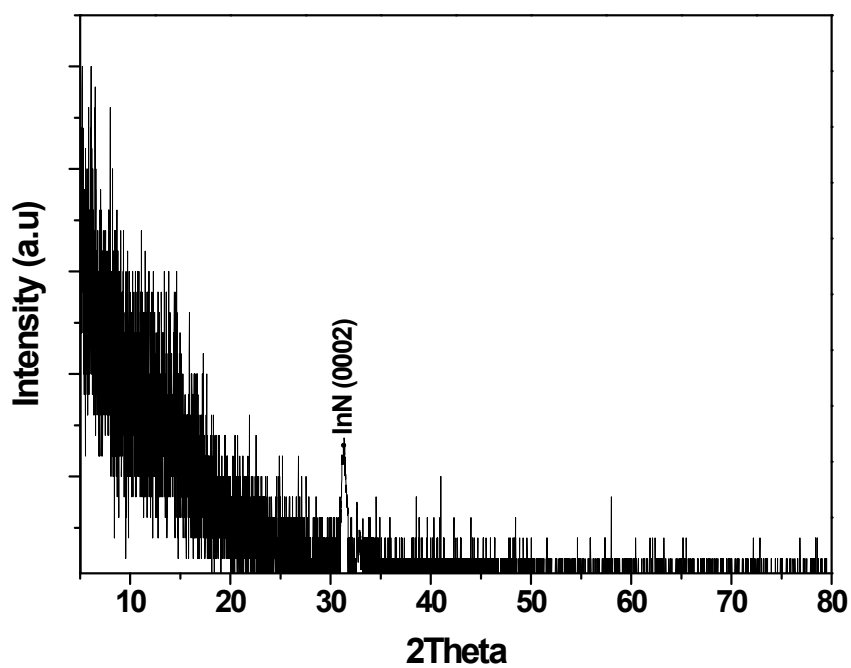

Figure S2. GI-XRD data of InN/GaN hetero-structure
